# Supplementary material for: How the latent geometry of a biological network provides information on its dynamics: the case of the gene network of chronic myeloid leukaemia
Source: Frontiers journal article supplement (doi:10.3389/fcell.2023.1235116), 2023-11-24
Supplement: Data_Sheet_1.ZIP [file Data_Sheet_1.ZIP]

## Sheet: Readme
README (from https://cran.r-project.org/web/packages/gprofiler2/vignettes/gprofiler2.html)
query - the name of the input query which by default is the order of query with the prefix “query_.” This can be changed by using a named list input.
significant - indicator for statistically significant results
p_value - hypergeometric p-value after correction for multiple testing
term_size - number of genes that are annotated to the term
query_size - number of genes that were included in the query. This might be different from the size of the original list if: 1) any genes were mapped to multiple Ensembl gene IDs; 2) any genes failed to be mapped to Ensembl gene IDs; 3) the parameter ordered_query = TRUE and the optimal cutoff for the term was found before the end of the query; 4) the domain_scope was set to “annotated” or “custo…
intersection_size - the number of genes in the input query that are annotated to the corresponding term
precision - the proportion of genes in the input list that are annotated to the function (defined as intersection_size/query_size)
recall - the proportion of functionally annotated genes that the query recovers (defined as intersection_size/term_size)
term_id - unique term identifier (e.g GO:0005005)
source - the abbreviation of the data source for the term (e.g. GO:BP)
term_name - the short name of the function
effective_domain_size - the total number of genes “in the universe” used for the hypergeometric test
source_order - numeric order for the term within its data source (this is important for drawing the results)
parents - list of term IDs that are hierarchically directly above the term. For non-hierarchical data sources this points to an artificial root node.

## Sheet: functional enrichment analysis 
ID	p_values	significant	term_size	query_sizes	intersection_sizes	source	term_name	effective_domain_size	source_order	parents
GO:0000981	4.62038e-08	TRUE	1364	197	61	GO:MF	DNA-binding transcription factor activity, RNA polymerase II-specific	20195	119	GO:0003700
GO:0000976	2.43715e-07	TRUE	1508	197	63	GO:MF	transcription cis-regulatory region binding	20195	115	c("GO:0001067", "GO:1990837")
GO:0001067	2.61689e-07	TRUE	1510	197	63	GO:MF	transcription regulatory region nucleic acid binding	20195	151	GO:0003676
GO:0000977	2.73539e-08	TRUE	1411	197	61	GO:MF	RNA polymerase II transcription regulatory region sequence-specific DNA binding	20195	116	GO:0000976
GO:0003690	2.77179e-07	TRUE	1667	197	66	GO:MF	double-stranded DNA binding	20195	332	GO:0003677
GO:1990837	3.10269e-07	TRUE	1566	197	64	GO:MF	sequence-specific double-stranded DNA binding	20195	11218	c("GO:0003690", "GO:0043565")
GO:0003700	3.17166e-07	TRUE	1415	197	61	GO:MF	DNA-binding transcription factor activity	20195	338	GO:0140110
GO:0000785	1.24895e-06	TRUE	1369	192	56	GO:CC	chromatin	22122	92	c("GO:0005694", "GO:0110165")
GO:0006357	1.34998e-06	TRUE	2564	189	78	GO:BP	regulation of transcription by RNA polymerase II	21110	2182	c("GO:0006355", "GO:0006366")
GO:0043565	1.88314e-06	TRUE	1672	197	65	GO:MF	sequence-specific DNA binding	20195	5822	GO:0003677
GO:0006366	4.16983e-06	TRUE	2677	189	79	GO:BP	transcription by RNA polymerase II	21110	2189	GO:0006351
GO:0140110	3.85876e-05	TRUE	1936	197	68	GO:MF	transcription regulator activity	20195	10583	GO:0003674
GO:0045944	0.000194273	TRUE	1257	189	53	GO:BP	positive regulation of transcription by RNA polymerase II	21110	12439	c("GO:0006357", "GO:0006366", "GO:0045893")
GO:0006355	0.000356161	TRUE	3455	189	87	GO:BP	regulation of DNA-templated transcription	21110	2180	c("GO:0006351", "GO:0010468", "GO:1903506")
GO:1903506	3.70547e-05	TRUE	3457	189	87	GO:BP	regulation of nucleic acid-templated transcription	21110	24157	c("GO:0097659", "GO:2001141")
GO:2001141	0.000582947	TRUE	3480	189	87	GO:BP	regulation of RNA biosynthetic process	21110	27647	c("GO:0010556", "GO:0031326", "GO:0032774", "GO:0051252")
GO:0000978	0.00113578	TRUE	1196	197	52	GO:MF	RNA polymerase II cis-regulatory region sequence-specific DNA binding	20195	117	c("GO:0000977", "GO:0000987")
GO:0000987	0.000236038	TRUE	1216	197	52	GO:MF	cis-regulatory region sequence-specific DNA binding	20195	120	GO:0000976
GO:0006351	0.00438462	TRUE	3585	189	87	GO:BP	DNA-templated transcription	21110	2176	GO:0097659
GO:0097659	0.00446795	TRUE	3586	189	87	GO:BP	nucleic acid-templated transcription	21110	19768	c("GO:0010467", "GO:0032774")
GO:0051252	0.00806503	TRUE	3774	189	89	GO:BP	regulation of RNA metabolic process	21110	14368	c("GO:0016070", "GO:0019219", "GO:0060255")
GO:0032774	0.000892099	TRUE	3623	189	87	GO:BP	RNA biosynthetic process	21110	8240	c("GO:0009059", "GO:0016070", "GO:0034654")
GO:0031323	0.0101614	TRUE	5493	189	109	GO:BP	regulation of cellular metabolic process	21110	7510	c("GO:0019222", "GO:0044237", "GO:0050794")
GO:1903508	0.0124047	TRUE	1718	189	59	GO:BP	positive regulation of nucleic acid-templated transcription	21110	24159	c("GO:0097659", "GO:1902680", "GO:1903506")
GO:0045893	0.0124047	TRUE	1718	189	59	GO:BP	positive regulation of DNA-templated transcription	21110	12393	c("GO:0006351", "GO:0006355", "GO:1903508")
GO:1902680	0.00151207	TRUE	1725	189	59	GO:BP	positive regulation of RNA biosynthetic process	21110	23482	c("GO:0010557", "GO:0031328", "GO:0032774", "GO:0051254", "GO:2001141")
GO:0019219	0.0185123	TRUE	4061	189	92	GO:BP	regulation of nucleobase-containing compound metabolic process	21110	5897	c("GO:0006139", "GO:0031323", "GO:0051171", "GO:0080090")
GO:0005694	0.0263988	TRUE	1939	192	60	GO:CC	chromosome	22122	284	GO:0043232
GO:0031326	0.0786275	TRUE	4064	189	91	GO:BP	regulation of cellular biosynthetic process	21110	7513	c("GO:0009889", "GO:0031323", "GO:0044249")
GO:0080090	0.100159	TRUE	5836	189	111	GO:BP	regulation of primary metabolic process	21110	18790	c("GO:0019222", "GO:0044238")
GO:0010556	0.204801	TRUE	3958	189	89	GO:BP	regulation of macromolecule biosynthetic process	21110	4304	c("GO:0009059", "GO:0009889", "GO:0060255")
GO:0031328	0.303676	TRUE	2023	189	62	GO:BP	positive regulation of cellular biosynthetic process	21110	7515	c("GO:0009891", "GO:0031325", "GO:0031326", "GO:0044249")
GO:0051171	0.453933	TRUE	5662	189	108	GO:BP	regulation of nitrogen compound metabolic process	21110	14316	c("GO:0006807", "GO:0019222")
GO:0009889	0.515967	TRUE	4177	189	91	GO:BP	regulation of biosynthetic process	21110	3827	c("GO:0009058", "GO:0019222")
GO:0051254	0.527005	TRUE	1857	189	59	GO:BP	positive regulation of RNA metabolic process	21110	14370	c("GO:0010604", "GO:0016070", "GO:0045935", "GO:0051252")
GO:0003677	0.896956	TRUE	2524	197	71	GO:MF	DNA binding	20195	324	GO:0003676
GO:0010557	0.932657	TRUE	1942	189	60	GO:BP	positive regulation of macromolecule biosynthetic process	21110	4305	c("GO:0009059", "GO:0009891", "GO:0010556", "GO:0010604")
GO:0034654	1.03527	TRUE	4055	189	89	GO:BP	nucleobase-containing compound biosynthetic process	21110	9171	c("GO:0006139", "GO:0018130", "GO:0019438", "GO:0044271", "GO:1901362")
GO:0009891	0.123132	TRUE	2081	189	62	GO:BP	positive regulation of biosynthetic process	21110	3829	c("GO:0009058", "GO:0009889", "GO:0009893")
GO:0001216	2.74668	TRUE	475	197	31	GO:MF	DNA-binding transcription activator activity	20195	179	GO:0003700
GO:0018130	3.43369	TRUE	4129	189	89	GO:BP	heterocycle biosynthetic process	21110	5504	c("GO:0044249", "GO:0046483")
GO:0019438	4.09265	TRUE	4140	189	89	GO:BP	aromatic compound biosynthetic process	21110	6097	c("GO:0006725", "GO:0044249")
GO:1901362	11.093	TRUE	4287	189	90	GO:BP	organic cyclic compound biosynthetic process	21110	22388	c("GO:1901360", "GO:1901576")
GO:0045935	12.3277	TRUE	2050	189	60	GO:BP	positive regulation of nucleobase-containing compound metabolic process	21110	12431	c("GO:0006139", "GO:0019219", "GO:0031325", "GO:0051173")
GO:0001228	17.9137	TRUE	471	197	30	GO:MF	DNA-binding transcription activator activity, RNA polymerase II-specific	20195	185	c("GO:0000981", "GO:0001216")
GO:0031325	19.2188	TRUE	2976	189	73	GO:BP	positive regulation of cellular metabolic process	21110	7512	c("GO:0009893", "GO:0031323", "GO:0044237", "GO:0048522")
GO:0050794	120.561	TRUE	11108	189	153	GO:BP	regulation of cellular process	21110	14008	c("GO:0009987", "GO:0050789")
GO:0044271	393.497	TRUE	4878	189	94	GO:BP	cellular nitrogen compound biosynthetic process	21110	11584	c("GO:0034641", "GO:0044249")
GO:0009059	630.782	TRUE	4824	189	93	GO:BP	macromolecule biosynthetic process	21110	3311	c("GO:0043170", "GO:1901576")
GO:0005667	634.411	TRUE	523	192	28	GO:CC	transcription regulator complex	22122	262	GO:0032991
GO:0010468	981.781	TRUE	5491	189	100	GO:BP	regulation of gene expression	21110	4251	c("GO:0010467", "GO:0060255")
GO:0065007	1668.01	TRUE	12891	189	164	GO:BP	biological regulation	21110	16811	GO:0008150
GO:0050789	2053.15	TRUE	12480	189	161	GO:BP	regulation of biological process	21110	14004	c("GO:0008150", "GO:0065007")
GO:0060255	2248.46	TRUE	6816	189	113	GO:BP	regulation of macromolecule metabolic process	21110	15305	c("GO:0019222", "GO:0043170")
GO:0019222	2746.19	TRUE	7345	189	118	GO:BP	regulation of metabolic process	21110	5900	c("GO:0008152", "GO:0050789")
GO:0009893	13799.9	TRUE	3848	189	79	GO:BP	positive regulation of metabolic process	21110	3831	c("GO:0008152", "GO:0019222", "GO:0048518")
GO:0048856	14124.4	TRUE	5896	189	102	GO:BP	anatomical structure development	21110	13840	GO:0032502
GO:0051173	1425.41	TRUE	3131	189	70	GO:BP	positive regulation of nitrogen compound metabolic process	21110	14318	c("GO:0006807", "GO:0009893", "GO:0051171")
GO:0007275	24752.6	TRUE	4658	189	88	GO:BP	multicellular organism development	21110	2871	c("GO:0032501", "GO:0048856")
GO:0044249	44494.1	TRUE	5521	189	97	GO:BP	cellular biosynthetic process	21110	11577	c("GO:0009058", "GO:0044237")
GO:0010604	55305.1	TRUE	3535	189	74	GO:BP	positive regulation of macromolecule metabolic process	21110	4347	c("GO:0009893", "GO:0043170", "GO:0060255")
GO:0009653	90034.7	TRUE	2712	189	63	GO:BP	anatomical structure morphogenesis	21110	3648	c("GO:0032502", "GO:0048856")
GO:0032502	143486	TRUE	6489	189	106	GO:BP	developmental process	21110	8032	GO:0008150
GO:0008134	376555	TRUE	599	197	28	GO:MF	transcription factor binding	20195	1575	GO:0005515
GO:0048522	395262	TRUE	5615	189	96	GO:BP	positive regulation of cellular process	21110	13543	c("GO:0009987", "GO:0048518", "GO:0050794")
GO:0048513	515270	TRUE	3128	189	67	GO:BP	animal organ development	21110	13536	GO:0048856
GO:0048731	937281	TRUE	3987	189	77	GO:BP	system development	21110	13728	c("GO:0007275", "GO:0048856")
GO:1901576	1.06285e+06	TRUE	5894	189	98	GO:BP	organic substance biosynthetic process	21110	22571	c("GO:0009058", "GO:0071704")
GO:0005654	1.15176e+06	TRUE	4203	192	76	GO:CC	nucleoplasm	22122	252	c("GO:0031981", "GO:0110165")
GO:0009058	2.38423e+06	TRUE	5969	189	98	GO:BP	biosynthetic process	21110	3310	GO:0008152
GO:0090575	5.02005e+06	TRUE	257	192	17	GO:CC	RNA polymerase II transcription regulator complex	22122	2866	c("GO:0005667", "GO:0140513")
GO:0048518	651456	TRUE	6358	189	101	GO:BP	positive regulation of biological process	21110	13539	c("GO:0008150", "GO:0050789")
GO:0072359	3.35355e+07	TRUE	1123	189	35	GO:BP	circulatory system development	21110	18343	GO:0048731
GO:0005515	6.63722e+07	TRUE	14881	197	179	GO:MF	protein binding	20195	1496	GO:0005488
GO:0048869	7.28367e+06	TRUE	4344	189	77	GO:BP	cellular developmental process	21110	13852	c("GO:0009987", "GO:0032502")
GO:0030154	1.46897e+08	TRUE	4318	189	76	GO:BP	cell differentiation	21110	7050	GO:0048869
GO:0032501	1.57888e+08	TRUE	7716	189	111	GO:BP	multicellular organismal process	21110	8031	GO:0008150
GO:0140297	1.65319e+08	TRUE	489	197	22	GO:MF	DNA-binding transcription factor binding	20195	10605	GO:0008134
GO:0043232	6.49702e+08	TRUE	6568	192	94	GO:CC	intracellular non-membrane-bounded organelle	22122	1889	c("GO:0043228", "GO:0043229")
GO:0043228	6.55085e+08	TRUE	6569	192	94	GO:CC	non-membrane-bounded organelle	22122	1885	GO:0043226
GO:0001221	1.00873e+09	TRUE	115	197	11	GO:MF	transcription coregulator binding	20195	181	GO:0008134
GO:0003682	1.29798e+09	TRUE	597	197	23	GO:MF	chromatin binding	20195	328	GO:0005488
GO:0009887	3.00372e+09	TRUE	1076	189	31	GO:BP	animal organ morphogenesis	21110	3825	c("GO:0009653", "GO:0048513")
GO:2000026	3.53206e+09	TRUE	1407	189	36	GO:BP	regulation of multicellular organismal development	21110	26633	c("GO:0007275", "GO:0050793", "GO:0051239")
TF:M10432	4.01935e+09	TRUE	9527	199	135	TF	Factor: MAZ; motif: GGGMGGGGS	20011	4996	TF:M00000
GO:0001944	4.29531e+09	TRUE	737	189	25	GO:BP	vasculature development	21110	570	c("GO:0048731", "GO:0072359")
TF:M02036_1	5.05135e+09	TRUE	5454	199	92	TF	Factor: WT1; motif: CGCCCCCNCN; match class: 1	20011	8987	TF:M02036
GO:0009725	7.67393e+09	TRUE	875	189	27	GO:BP	response to hormone	21110	3700	c("GO:0009719", "GO:0010033")
GO:0050793	7.98297e+09	TRUE	2482	189	50	GO:BP	regulation of developmental process	21110	14007	c("GO:0032502", "GO:0050789")
GO:0001568	8.32031e+09	TRUE	706	189	24	GO:BP	blood vessel development	21110	367	c("GO:0001944", "GO:0048856")
GO:0005634	0.000105576990048295	TRUE	10124	192	123	GO:CC	nucleus	22122	243	GO:0043231
GO:0048523	0.000126827499704152	TRUE	4753	189	76	GO:BP	negative regulation of cellular process	21110	13544	c("GO:0009987", "GO:0048519", "GO:0050794")
REAC:R-HSA-9614399	0.00013064430808822	TRUE	12	130	5	REAC	Regulation of localization of FOXO transcription factors	10790	1927	REAC:R-HSA-9614085
GO:0051239	0.000158202456681428	TRUE	3021	189	56	GO:BP	regulation of multicellular organismal process	21110	14358	c("GO:0032501", "GO:0050789")
GO:0061629	0.00024204090238858	TRUE	353	197	16	GO:MF	RNA polymerase II-specific DNA-binding transcription factor binding	20195	8515	GO:0140297
GO:0045892	0.000266902207969401	TRUE	1317	189	33	GO:BP	negative regulation of DNA-templated transcription	21110	12392	c("GO:0006351", "GO:0006355", "GO:1903507")
GO:1903507	0.000276561701740078	TRUE	1319	189	33	GO:BP	negative regulation of nucleic acid-templated transcription	21110	24158	c("GO:0097659", "GO:1902679", "GO:1903506")
GO:1902679	0.000353930899929629	TRUE	1333	189	33	GO:BP	negative regulation of RNA biosynthetic process	21110	23481	c("GO:0010558", "GO:0031327", "GO:0032774", "GO:0051253", "GO:2001141")
GO:0048468	0.000359026594589974	TRUE	2763	189	52	GO:BP	cell development	21110	13507	c("GO:0030154", "GO:0048856", "GO:0048869")
GO:0031981	0.000473536351118971	TRUE	5499	192	78	GO:CC	nuclear lumen	22122	1230	c("GO:0005634", "GO:0070013")
TF:M01873	0.000530209882304842	TRUE	6888	199	105	TF	Factor: Egr-1; motif: GCGGGGGCGG	20011	1632	TF:M00000
GO:0045595	0.000545829300976363	TRUE	1568	189	36	GO:BP	regulation of cell differentiation	21110	12146	c("GO:0030154", "GO:0050793", "GO:0050794")
GO:0046332	0.00055423385507201	TRUE	78	197	8	GO:MF	SMAD binding	20195	6203	GO:0005515
GO:0005488	0.00067474970160202	TRUE	18338	197	195	GO:MF	binding	20195	1484	GO:0003674
TF:M02036	0.00075798219644514	TRUE	10003	199	136	TF	Factor: WT1; motif: CGCCCCCNCN	20011	8986	TF:M00000
GO:0097159	0.00094299782734816	TRUE	7529	197	106	GO:MF	organic cyclic compound binding	20195	9161	GO:0005488
GO:0035239	0.000976144262432947	TRUE	867	189	25	GO:BP	tube morphogenesis	21110	9403	c("GO:0009653", "GO:0035295")
GO:0003676	0.00102745812684725	TRUE	5476	197	84	GO:MF	nucleic acid binding	20195	323	c("GO:0097159", "GO:1901363")
GO:1901363	0.00111387390219027	TRUE	7455	197	105	GO:MF	heterocyclic compound binding	20195	10974	GO:0005488
GO:0043233	0.00112912714470567	TRUE	6635	192	88	GO:CC	organelle lumen	22122	1890	c("GO:0031974", "GO:0043226")
GO:0070013	0.00112912714470567	TRUE	6635	192	88	GO:CC	intracellular organelle lumen	22122	2406	c("GO:0043229", "GO:0043233")
GO:0031974	0.00112912714470567	TRUE	6635	192	88	GO:CC	membrane-enclosed lumen	22122	1224	GO:0110165
GO:0010558	0.001193217600481	TRUE	1547	189	35	GO:BP	negative regulation of macromolecule biosynthetic process	21110	4306	c("GO:0009059", "GO:0009890", "GO:0010556", "GO:0010605")
GO:0045934	0.0014108489386487	TRUE	1558	189	35	GO:BP	negative regulation of nucleobase-containing compound metabolic process	21110	12430	c("GO:0006139", "GO:0019219", "GO:0031324", "GO:0051172")
GO:0009890	0.00153258748827138	TRUE	1636	189	36	GO:BP	negative regulation of biosynthetic process	21110	3828	c("GO:0009058", "GO:0009889", "GO:0009892")
TF:M07354	0.00195650997493883	TRUE	8103	199	116	TF	Factor: Egr-1; motif: GCGGGGGCGG	20011	1630	TF:M00000
GO:0031327	0.00214366097075468	TRUE	1586	189	35	GO:BP	negative regulation of cellular biosynthetic process	21110	7514	c("GO:0009890", "GO:0031324", "GO:0031326", "GO:0044249")
GO:0051253	0.0021680274868048	TRUE	1443	189	33	GO:BP	negative regulation of RNA metabolic process	21110	14369	c("GO:0010605", "GO:0016070", "GO:0045934", "GO:0051252")
GO:0031324	0.00221017594369969	TRUE	2194	189	43	GO:BP	negative regulation of cellular metabolic process	21110	7511	c("GO:0009892", "GO:0031323", "GO:0044237", "GO:0048523")
GO:2000628	0.00226285616132116	TRUE	80	189	8	GO:BP	regulation of miRNA metabolic process	21110	27188	c("GO:0010586", "GO:0051252")
TF:M07461_1	0.00235430183274899	TRUE	3501	199	64	TF	Factor: KLF; motif: GGGNGGGG; match class: 1	20011	4605	TF:M07461
TF:M09826_1	0.00268953181291047	TRUE	7853	199	113	TF	Factor: BTEB3; motif: CCNNSCCNSCCCCKCCCCC; match class: 1	20011	627	TF:M09826
TF:M12722_1	0.00293581104834216	TRUE	6819	199	102	TF	Factor: ZXDL; motif: GSGSCNNGGGMRGCNCCGGGS; match class: 1	20011	11647	TF:M12722
GO:0042127	0.00296904900564149	TRUE	1682	189	36	GO:BP	regulation of cell population proliferation	21110	10550	c("GO:0008283", "GO:0050794")
REAC:R-HSA-198693	0.00299995446619682	TRUE	10	130	4	REAC	AKT phosphorylates targets in the nucleus	10790	12	REAC:R-HSA-1257604
GO:0007399	0.00324606110473021	TRUE	2547	189	47	GO:BP	nervous system development	21110	2969	GO:0048731
TF:M08878_1	0.00357877148086373	TRUE	3303	199	61	TF	Factor: EGR; motif: CGCCCCCGCNN; match class: 1	20011	1671	TF:M08878
GO:0009888	0.00402241669105913	TRUE	2008	189	40	GO:BP	tissue development	21110	3826	GO:0048856
REAC:R-HSA-212436	0.00407257854676659	TRUE	1222	130	33	REAC	Generic Transcription Pathway	10790	991	REAC:R-HSA-73857
GO:1902894	0.00482827507568966	TRUE	22	189	5	GO:BP	negative regulation of miRNA transcription	21110	23652	c("GO:0045892", "GO:0061614", "GO:1902893", "GO:2000629")
GO:0043227	0.0048751151228912	TRUE	15705	192	162	GO:CC	membrane-bounded organelle	22122	1884	GO:0043226
GO:0001525	0.0054497195705617	TRUE	530	189	18	GO:BP	angiogenesis	21110	344	c("GO:0048514", "GO:0048646")
REAC:R-HSA-74160	0.00552699940595649	TRUE	1479	130	37	REAC	Gene expression (Transcription)	10790	989	REAC:0000000
GO:0016070	0.00555459545758311	TRUE	6983	189	94	GO:BP	RNA metabolic process	21110	5221	GO:0090304
GO:0043231	0.00560607148097932	TRUE	14642	192	154	GO:CC	intracellular membrane-bounded organelle	22122	1888	c("GO:0043227", "GO:0043229")
GO:2000629	0.00612477039726253	TRUE	23	189	5	GO:BP	negative regulation of miRNA metabolic process	21110	27189	c("GO:0010586", "GO:0051253", "GO:2000628")
TF:M08878	0.00615741166757115	TRUE	7674	199	110	TF	Factor: EGR; motif: CGCCCCCGCNN	20011	1670	TF:M00000
GO:0019899	0.00616136173240218	TRUE	2093	197	41	GO:MF	enzyme binding	20195	3754	GO:0005515
GO:0043229	0.0066488780174701	TRUE	16038	192	164	GO:CC	intracellular organelle	22122	1886	c("GO:0005622", "GO:0043226")
GO:0007507	0.00665597623986727	TRUE	594	189	19	GO:BP	heart development	21110	3064	c("GO:0048513", "GO:0072359")
REAC:R-HSA-9755779	0.00694004064365547	TRUE	12	130	4	REAC	SARS-CoV-2 targets host intracellular signalling and regulatory pathways	10790	2005	REAC:R-HSA-9705683
TF:M09636_1	0.00703127379262823	TRUE	14426	199	172	TF	Factor: MAZ; motif: GGGMGGGGSSGGGGGGGGGGGG; match class: 1	20011	4993	TF:M09636
TF:M09834	0.00708408151783269	TRUE	7121	199	104	TF	Factor: ZNF148; motif: NNNNNNCCNNCCCCTCCCCCACCCN	20011	9506	TF:M00000
GO:0000122	0.00716800523606116	TRUE	967	189	25	GO:BP	negative regulation of transcription by RNA polymerase II	21110	51	c("GO:0006357", "GO:0006366", "GO:0045892")
TF:M04953	0.00779473881414665	TRUE	8886	199	122	TF	Factor: Sp1; motif: GGNDGGRGGCGGGG	20011	7830	TF:M00000
GO:0010586	0.00846405772527443	TRUE	95	189	8	GO:BP	miRNA metabolic process	21110	4330	GO:0034660
GO:0048519	0.00849456082758236	TRUE	5932	189	83	GO:BP	negative regulation of biological process	21110	13540	c("GO:0008150", "GO:0050789")
GO:0050896	0.00898876259390886	TRUE	9081	189	113	GO:BP	response to stimulus	21110	14092	GO:0008150
GO:1902893	0.00959180679543922	TRUE	68	189	7	GO:BP	regulation of miRNA transcription	21110	23651	c("GO:0006355", "GO:0061614", "GO:2000628")
REAC:R-HSA-9614085	0.0101532245669116	TRUE	66	130	7	REAC	FOXO-mediated transcription	10790	877	REAC:R-HSA-212436
GO:0061614	0.0105946114724563	TRUE	69	189	7	GO:BP	miRNA transcription	21110	16494	c("GO:0006351", "GO:0010586")
GO:0043226	0.0112118272434653	TRUE	16842	192	169	GO:CC	organelle	22122	1883	GO:0110165
GO:0022008	0.0112259145212318	TRUE	1705	189	35	GO:BP	neurogenesis	21110	6923	c("GO:0007399", "GO:0030154")
REAC:R-HSA-73857	0.0114776296748499	TRUE	1343	130	34	REAC	RNA Polymerase II Transcription	10790	1798	REAC:R-HSA-74160
TF:M10432_1	0.0118901664663903	TRUE	4494	199	74	TF	Factor: MAZ; motif: GGGMGGGGS; match class: 1	20011	4997	TF:M10432
GO:0048514	0.0121361831259705	TRUE	619	189	19	GO:BP	blood vessel morphogenesis	21110	13537	c("GO:0001568", "GO:0035239")
GO:0030182	0.0122734541840164	TRUE	1415	189	31	GO:BP	neuron differentiation	21110	7062	c("GO:0030154", "GO:0048699")
GO:0048699	0.0122788387251924	TRUE	1488	189	32	GO:BP	generation of neurons	21110	13696	GO:0022008
TF:M12722	0.0128435010643816	TRUE	10824	199	140	TF	Factor: ZXDL; motif: GSGSCNNGGGMRGCNCCGGGS	20011	11646	TF:M00000
TF:M07040_1	0.0129873579220308	TRUE	8362	199	116	TF	Factor: GKLF; motif: NNRRGRRNGNSNNN; match class: 1	20011	3167	TF:M07040
GO:0001217	0.0131813409186661	TRUE	329	197	13	GO:MF	DNA-binding transcription repressor activity	20195	180	GO:0003700
GO:0009719	0.0136505630388293	TRUE	1720	189	35	GO:BP	response to endogenous stimulus	21110	3694	GO:0050896
GO:0007517	0.0136967361143161	TRUE	351	189	14	GO:BP	muscle organ development	21110	3070	c("GO:0048513", "GO:0061061")
TF:M09984	0.0138921014410398	TRUE	9784	199	130	TF	Factor: MAZ; motif: GGGGGAGGGGGNGRGRRRGNRG	20011	4994	TF:M00000
WP:WP1982	0.014138258451782	TRUE	71	108	7	WP	Sterol regulatory element-binding proteins (SREBP) signaling	8133	211	WP:000000
GO:0043627	0.0155249708918635	TRUE	73	189	7	GO:BP	response to estrogen	21110	11408	GO:0009725
GO:0030097	0.0156172269865925	TRUE	944	189	24	GO:BP	hemopoiesis	21110	7038	GO:0048468
TF:M09723_1	0.0161470165821896	TRUE	6300	199	94	TF	Factor: BTEB1; motif: GGGGGCGGGGCNGSGGGNGS; match class: 1	20011	613	TF:M09723
GO:0035295	0.0166159491891033	TRUE	1082	189	26	GO:BP	tube development	21110	9435	c("GO:0007275", "GO:0048856")
GO:0048568	0.0167738249832501	TRUE	462	189	16	GO:BP	embryonic organ development	21110	13579	c("GO:0009790", "GO:0048513")
TF:M07039_1	0.0171992275808113	TRUE	13933	199	167	TF	Factor: ETF; motif: CCCCGCCCCYN; match class: 1	20011	2167	TF:M07039
GO:0051172	0.0176378490004539	TRUE	2374	189	43	GO:BP	negative regulation of nitrogen compound metabolic process	21110	14317	c("GO:0006807", "GO:0009892", "GO:0051171")
REAC:R-HSA-111447	0.0186076512372801	TRUE	15	130	4	REAC	Activation of BAD and translocation to mitochondria	10790	72	REAC:R-HSA-114452
WP:WP4149	0.0203301758375309	TRUE	32	108	5	WP	White fat cell differentiation	8133	62	WP:000000
TF:M12160	0.0213011631477483	TRUE	13015	199	159	TF	Factor: KLF15; motif: RCCMCRCCCMCN	20011	4550	TF:M00000
KEGG:05202	0.0218446041510277	TRUE	192	99	10	KEGG	Transcriptional misregulation in cancer	8161	447	KEGG:00000
GO:0030099	0.0227039506774679	TRUE	419	189	15	GO:BP	myeloid cell differentiation	21110	7040	c("GO:0030097", "GO:0030154")
TF:M08205_1	0.0231787609299686	TRUE	10699	199	138	TF	Factor: E2F-1:Elk-1; motif: SGCGCSNNAMCGGAAGT; match class: 1	20011	1429	TF:M08205
GO:0060284	0.0232218280742977	TRUE	835	189	22	GO:BP	regulation of cell development	21110	15333	c("GO:0045595", "GO:0048468")
TF:M12160_1	0.0233689740095388	TRUE	8250	199	114	TF	Factor: KLF15; motif: RCCMCRCCCMCN; match class: 1	20011	4551	TF:M12160
TF:M01973_1	0.0235069068925946	TRUE	2473	199	48	TF	Factor: PLAG1; motif: CCCCCKWNNNGGSCCC; match class: 1	20011	6639	TF:M01973
GO:0048646	0.0239264388173378	TRUE	1174	189	27	GO:BP	anatomical structure formation involved in morphogenesis	21110	13644	c("GO:0009653", "GO:0032502")
REAC:R-HSA-9614657	0.0245791571134959	TRUE	16	130	4	REAC	FOXO-mediated transcription of cell death genes	10790	879	REAC:R-HSA-9614085
CORUM:6242	0.0282240506459665	TRUE	2	46	2	CORUM	14-3-3q-SGK1-tau complex	3383	1997	CORUM:0000000
CORUM:7102	0.0282240506459665	TRUE	2	46	2	CORUM	SOX2-VRK1 complex	3383	2599	CORUM:0000000
TF:M07354_1	0.0288799859283111	TRUE	3757	199	64	TF	Factor: Egr-1; motif: GCGGGGGCGG; match class: 1	20011	1631	TF:M07354
GO:0045597	0.0301688280174607	TRUE	849	189	22	GO:BP	positive regulation of cell differentiation	21110	12148	c("GO:0030154", "GO:0045595", "GO:0048522", "GO:0051094")
REAC:R-HSA-162582	0.030973488049877	TRUE	2535	130	51	REAC	Signal Transduction	10790	2089	REAC:0000000
TF:M07397	0.0311302490164734	TRUE	7325	199	104	TF	Factor: ZBP89; motif: CCCCKCCCCCNN	20011	9072	TF:M00000
TF:M07040	0.0317398100865864	TRUE	12959	199	158	TF	Factor: GKLF; motif: NNRRGRRNGNSNNN	20011	3166	TF:M00000
WP:WP4542	0.0317522788968017	TRUE	35	108	5	WP	Leukocyte-intrinsic Hippo pathway functions	8133	520	WP:000000
TF:M12489_1	0.0321936175050204	TRUE	1699	199	37	TF	Factor: KLF4; motif: NNCCCCACCCNN; match class: 1	20011	4589	TF:M12489
GO:0032870	0.034914412214099	TRUE	606	189	18	GO:BP	cellular response to hormone stimulus	21110	8294	c("GO:0009725", "GO:0071310", "GO:0071495")
TF:M07486	0.0357438688015733	TRUE	12977	199	158	TF	Factor: ZNF300; motif: SWGGGGGSN	20011	9900	TF:M00000
TF:M10112	0.0364118512226332	TRUE	8711	199	118	TF	Factor: Miz-1; motif: NNRGGWGGGGGAGGGGMRR	20011	5200	TF:M00000
GO:0035035	0.0400836225539416	TRUE	23	197	4	GO:MF	histone acetyltransferase binding	20195	5302	GO:0019899
GO:0009790	0.0445364666043728	TRUE	1144	189	26	GO:BP	embryo development	21110	3755	GO:0007275
TF:M00649	0.0449525730220736	TRUE	9550	199	126	TF	Factor: MAZ; motif: GGGGAGGG	20011	5002	TF:M00000
GO:0048598	0.0454851879164926	TRUE	618	189	18	GO:BP	embryonic morphogenesis	21110	13605	c("GO:0009653", "GO:0009790")
TF:M08867	0.0468570792940945	TRUE	10280	199	133	TF	Factor: AP2; motif: GCCYGSGGSN	20011	152	TF:M00000
GO:0070887	0.0473599776075124	TRUE	2722	189	46	GO:BP	cellular response to chemical stimulus	21110	17294	c("GO:0042221", "GO:0051716")
GO:0001223	0.0495668634020819	TRUE	46	197	5	GO:MF	transcription coactivator binding	20195	183	GO:0001221
